# Supplementary material
Source: PubMed Central journal article supplement (PMC6282209)
Supplement: mbo006184197sf4.pdf [file mbo006184197sf4.pdf]

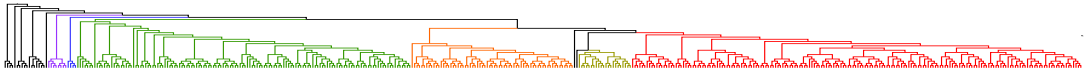

|                 |    |  |
|-----------------|----|--|
| Col (Ye4449)    | 1  |  |
| Col156          | 2  |  |
| ColRNAI         | 2  |  |
| ColpVC          | 6  |  |
| IncA/C          | 4  |  |
| IncB/O/K/Z      | 7  |  |
| IncFIB (K)      | 1  |  |
| IncFIB (pB171)  | 17 |  |
| IncFIB (pLF82)  | 2  |  |
| IncFII          | 28 |  |
| IncFII (29)     | 56 |  |
| IncFII (Yp)     | 3  |  |
| IncFII (p14)    | 14 |  |
| IncFII (pCRY)   | 6  |  |
| IncHI2          | 1  |  |
| IncHI2A         | 1  |  |
| IncI1           | 14 |  |
| IncL/M (pMU407) | 4  |  |
| IncN            | 1  |  |
| IncQ1           | 5  |  |
| IncX1           | 7  |  |
| IncX2           | 1  |  |
| pSL483          | 2  |  |
| repA            | 1  |  |
