# Supplementary material
Source: PubMed Central journal article supplement (PMC6282209)

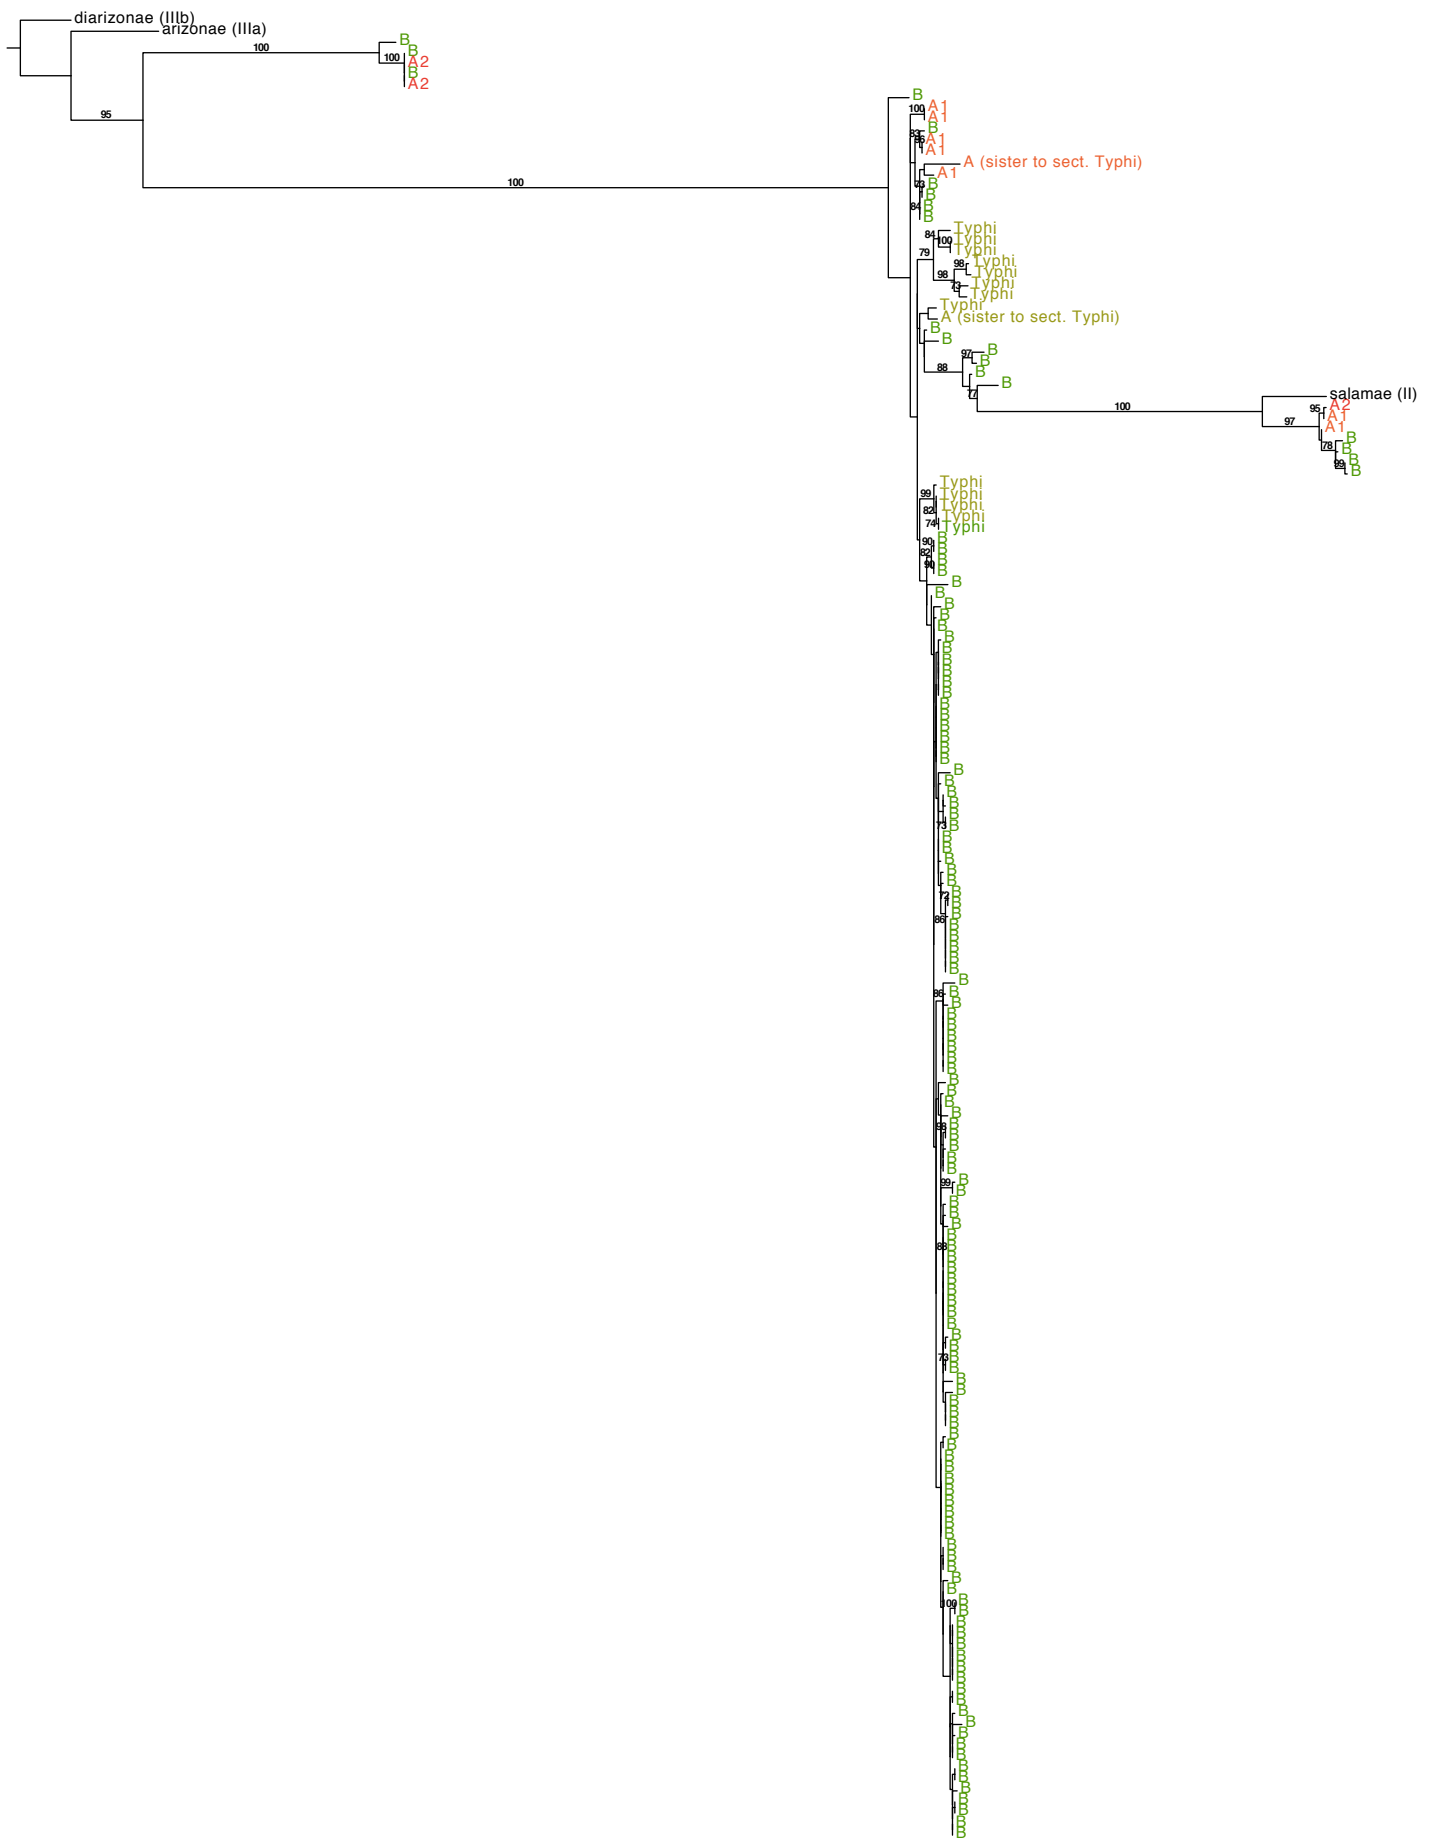

Supplement: mbo006184197sf5.pdf [file mbo006184197sf5.pdf]
